# Supplementary material
Source: MDPI journal article supplement (https://www.mdpi.com/2504-5377/2/1/6)
Supplement: s1 [file s1]

Archive with 3 entries (3 files):
- SF/acetonitrile_SM.pdf
- SF/video1.avi
- SF/video2.avi
