# Supplementary material
Source: MDPI journal article supplement (https://www.mdpi.com/2504-5377/2/1/6)
Supplement: s1 [file s1 › SF/acetonitrile_SM.pdf]

Supplementary Materials for:  
Acetonitrile-Induced Destabilization in Liposomes

Kazunari Yoshida, Ryohei Mitsumori, Keitaro Horii,  
Akito Takashima, and Izumi Nishio

## Contents

|          |                                                      |           |
|----------|------------------------------------------------------|-----------|
| <b>1</b> | <b>Captions of videos</b>                            | <b>S2</b> |
| <b>2</b> | <b>Histogram plots of averaged Fourier amplitude</b> | <b>S3</b> |

# 1 Captions of videos

video1.avi:

Video of membrane fluctuation in absence (control) of acetonitrile, corresponding to Figure 2a.

video2.avi:

Video of membrane fluctuation in presence of acetonitrile, corresponding to Figure 2b.

## 2 Histogram plots of averaged Fourier amplitude

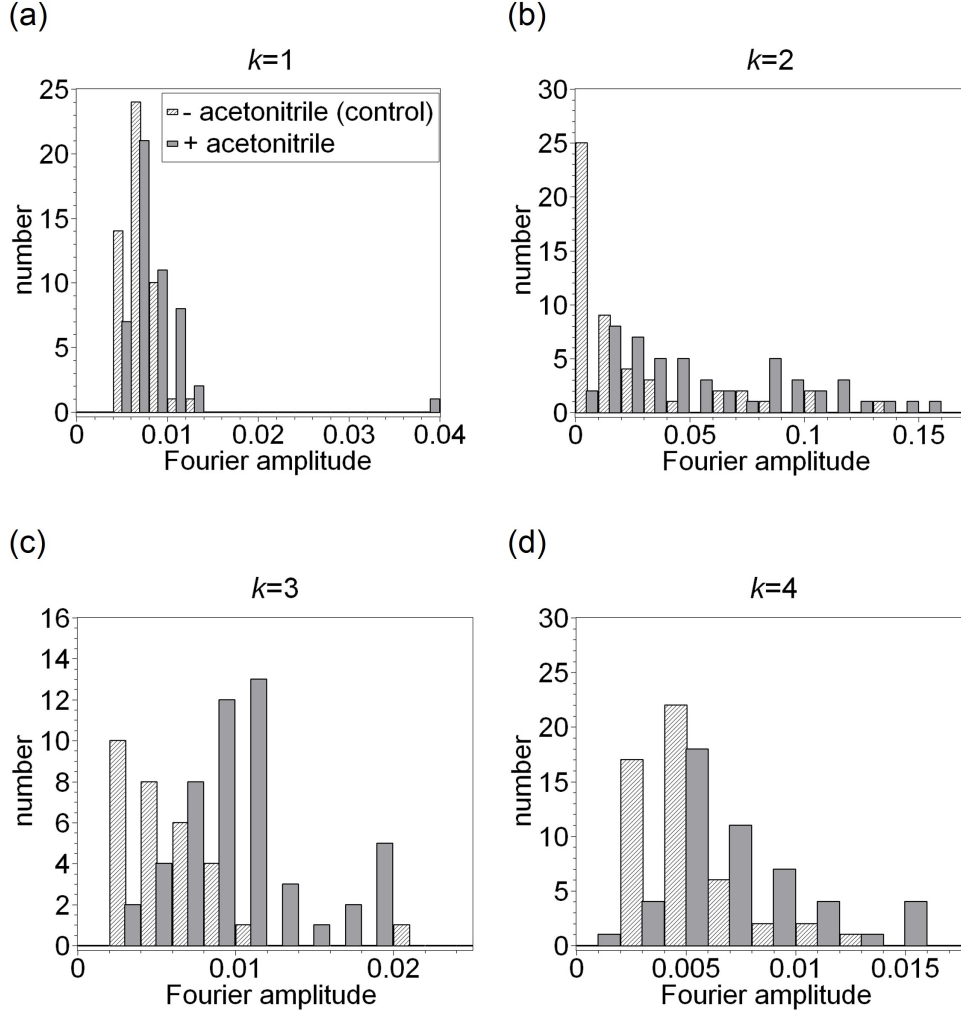

Figure S1: (a, b, c and d) Histogram plots showing the averaged Fourier amplitude values at  $k = 1, 2, 3$ , and  $4$  ( $n = 50$  each), corresponding to Figure 3(c). Ranges of these four histograms are different.
